1 **Title:** Natural Language Processing Can Automate Extraction of Barrett's Esophagus  
2 Endoscopy Quality Metrics  
3

4 **AUTHORS:** Ali Soroush, MD, MS<sup>1</sup>, Courtney J. Diamond, MA<sup>2</sup>, Haley M. Zylberberg, MD<sup>1</sup>,  
5 Benjamin May<sup>3</sup>, Nicholas Tatonetti, PhD<sup>2,4,5</sup>, Julian A. Abrams, MD, MS<sup>1,3</sup>, Chunhua Weng,  
6 PhD<sup>2</sup>  
7

- 8 1. Division of Digestive and Liver Diseases, Department of Medicine, Columbia University  
9 Irving Medical Center, New York, NY, USA
- 10 2. Department of Biomedical Informatics, Columbia University Irving Medical Center, New  
11 York, NY, USA
- 12 3. Herbert Irving Comprehensive Cancer Center, Columbia University Irving Medical Center,  
13 New York, NY, USA
- 14 4. Department of Computational Biomedicine, Cedars-Sinai Medical Center, Los Angeles, CA,  
15 USA
- 16 5. Cedars-Sinai Cancer, Cedars-Sinai Medical Center, Los Angeles, CA, USA  
17

18 **Corresponding author:**

19 Name: Ali Soroush

20 Email: [ali.soroush@mountsinai.org](mailto:ali.soroush@mountsinai.org)  
21

22 **Word Count (text only):** 2852  
23

24 **Guarantor of the article:** Ali Soroush  
25

26 **Specific author contributions:**

27 AS: conceptualization, methodology, formal analysis, data curation, writing – original draft,  
28 writing – review & editing, project administration

29 CJD: methodology, formal analysis, writing – original draft, writing – review & editing

30 HMZ: data curation, writing – review & editing

31 BM: data curation, writing – review & editing

32 NT: writing – review & editing, supervision

33 JAA: conceptualization, writing – review & editing, supervision

34 CW: conceptualization, methodology, writing – review & editing, supervision

## **Study Highlights:**

- 1) WHAT IS KNOWN:
  - Existing BE clinical data extraction methods are limited.
- 2) WHAT IS NEW HERE:
  - An NLP pipeline for granular BE clinical data.

1 **ABSTRACT:**

2

3 **Objectives:** To develop an automated natural language processing (NLP) method for extracting  
4 high-fidelity Barrett's Esophagus (BE) endoscopic surveillance and treatment data from the  
5 electronic health record (EHR).

6

7 **Methods:** Patients who underwent BE-related endoscopies between 2016 and 2020 at a single  
8 medical center were randomly assigned to a development or validation set. Those not aged 40  
9 to 80 and those without confirmed BE were excluded. For each patient, free text pathology  
10 reports and structured procedure data were obtained. Gastroenterologists assigned ground truth  
11 labels. An NLP method leveraging MetaMap Lite generated endoscopy-level diagnosis and  
12 treatment data. Performance metrics were assessed for this data. The NLP methodology was  
13 then adapted to label key endoscopic eradication therapy (EET)-related endoscopy events and  
14 thereby facilitate calculation of patient-level pre-EET diagnosis, endotherapy time, and time to  
15 CE-IM.

16

17 **Results:** 99 patients (377 endoscopies) and 115 patients (399 endoscopies) were included in  
18 the development and validation sets respectively. When assigning high-fidelity labels to the  
19 validation set, NLP achieved high performance (recall: 0.976, precision: 0.970, accuracy: 0.985,  
20 and F1-score: 0.972). 77 patients initiated EET and underwent 554 endoscopies. Key EET-  
21 related clinical event labels had high accuracy (EET start: 0.974, CE-D: 1.00, and CE-IM: 1.00),  
22 facilitating extraction of pre-treatment diagnosis, endotherapy time, and time to CE-IM.

23

24 **Conclusions:** High-fidelity BE endoscopic surveillance and treatment data can be extracted  
25 from routine EHR data using our automated, transparent NLP method. This method produces  
26 high-level clinical datasets for clinical research and quality metric assessment.

27

28 **Keywords:** natural language processing, Barrett's esophagus, quality improvement

## 1 INTRODUCTION

2 Esophageal adenocarcinoma (EAC) has been rising in incidence since the 1970s (1, 2).  
3 Despite advances in screening, surveillance, and treatment of EAC, five-year survival remains  
4 under 25% (3). Barrett's esophagus is a premalignant precursor to EAC, characterized by a  
5 change in from normal squamous epithelium to columnar epithelium (4). US guidelines have  
6 established protocols for the endoscopic surveillance and treatment of dysplastic BE and  
7 intramucosal EAC (5-7). However, adherence to these complex guidelines has been poor (8).  
8 Quality metrics have been proposed to standardize BE-related endoscopic surveillance and  
9 treatment (9, 10), but use of this measures is limited due to challenges with efficiently  
10 abstracting high-quality clinical history and outcomes data.

11 Patients with BE undergo many surveillance and treatment endoscopies over the course  
12 of their lifetimes, in some cases accumulating tens of free text endoscopy and pathology  
13 reports. Billing codes have not been used to automate BE-related clinical data extraction due to  
14 inadequate code granularity and temporality (11). In the most recent US version of the  
15 International Classification of Diseases codes (ICD-10-CM), there is no code for a diagnosis of  
16 indefinite for dysplasia and, in older versions, there is only one code for all BE-related  
17 diagnoses. Moreover, ICD codes for BE cannot distinguish between prior and current  
18 diagnoses, resulting in procedure-associated diagnosis codes that represent the worst prior BE-  
19 related diagnosis, rather than the current BE-related diagnosis. Current Procedural  
20 Terminology (CPT) codes are similarly limited as they cannot distinguish among the different  
21 types of endoscopic ablative therapy (radiofrequency, cryotherapy, or argon plasma  
22 coagulation) commonly used to treat dysplastic BE and intramucosal EAC. Manual chart review  
23 remains the only viable option to date for extracting BE-related endoscopic surveillance and  
24 treatment data from clinical records. However, this approach is error-prone, not scalable, and  
25 time-consuming, limiting its use for clinical research and quality metric assessment (12-15).

26 Natural language processing (NLP) has improved data abstraction accuracy and  
27 efficiency for colonoscopy-related quality metrics like adenoma detection rate and bowel  
28 preparation quality, but few studies to date have created NLP tools for BE-related endoscopy  
29 (16-25). NLP pipelines for these metrics have used combinations of rule-based methods and  
30 clinical NLP tools to extract key data elements (26, 27). While most studies created NLP  
31 pipelines for clinical research, one study built a pipeline for the ongoing measurement of  
32 colonoscopy quality measures (21). A few studies included limited clinical data summarization  
33 and decision support (19, 21, 28). To date, there is a single BE-related NLP pipeline, which  
34 extracts dysplasia diagnoses from the Veterans' Affairs electronic health records (EHR) system  
35 with high performance (29). Here we present an NLP system that automates extraction of a  
36 broader range of clinical outcomes data for both endoscopic BE surveillance and BE-related  
37 treatment, allowing automation of downstream clinical history summarization, quality metric  
38 measurement, and outcomes research.

39

## 40 **MATERIALS AND METHODS**

### 41 **Data Source**

42 We queried the ProVation (Minneapolis, MN, USA) clinical database to identify patients  
43 who underwent upper endoscopy between January 1, 2016 and December 31, 2020 at  
44 Columbia University Irving Medical Center (CUIMC) and had a free text procedure indication  
45 related to BE surveillance or endotherapy. ProVation is an endoscopy documentation system  
46 that captures and stores structured data in addition to transmitting a free text note to the CUIMC  
47 Clinical Data Repository (CDR). We extracted all free text pathology notes as well as structured  
48 ProVation maneuver and impression data obtained during the same period. Pathology reports  
49 were written in the Cerner CoPath (Kansas City, MO, USA) and transmitted to the CDR as free  
50 text. Free text pathology reports were ultimately extracted from both Allscripts (Chicago, IL,

51 USA) and Epic (Verona, WI, USA) electronic health record (EHR) systems, as CUIMC  
52 transitioned from Allscripts to Epic in February 2020.

53

## 54 **System Development**

55 To develop the pipeline, we randomly assigned 300 patients with a BE-related indication either  
56 to the development or validation sets. Gastroenterologists performed manual review of the EHR  
57 to determine ground truth diagnosis and endotherapy labels for each pathology report and  
58 procedure respectively. Histologic diagnosis labels included *no BE*, *no dysplasia*, *indefinite for*  
59 *dysplasia*, *low-grade dysplasia (LGD)*, *high-grade dysplasia (HGD)*, and *EAC*. Using these  
60 labels, a second set of simplified and clinically relevant binary diagnosis labels  
61 (presence/absence) of 1) low-grade dysplasia or worse and 2) EAC were derived. Endotherapy  
62 labels included *endoscopic mucosal resection (EMR)*, *endoscopic submucosal dissection*  
63 *(ESD)*, *radiofrequency ablation (RFA)*, *argon plasma coagulation (APC)*, and *cryotherapy*. One  
64 gastroenterologist reviewed records for the development set and two gastroenterologists  
65 reviewed records for the validation set. Discrepant results in the validation set were adjudicated  
66 by a third, expert gastroenterologist. We excluded patients who did not have manually  
67 confirmed diagnoses of BE (at least 1 cm of endoscopically identifiable BE and intestinal  
68 metaplasia found on esophageal biopsies) or were not 40-80 years old. We generated and  
69 troubleshooted the data processing pipeline exclusively using the development set. With each  
70 version of the pipeline, we reviewed classification errors and adjusted data processing rules as  
71 generally as possible to maximize pipeline performance. All classification errors potentially  
72 related to incorrect ground truth labels were resolved by a repeat of the initial manual review  
73 process. The validation set was used to measure performance metrics exclusively.

74

## 75 **Natural Language Processing**

76 We processed pathology text using an approach combining regular expressions and  
77 MetaMapLite (30). We first excluded pathology reports lacking esophageal specimens,  
78 duplicate reports, and reports without any diagnostic information. Brushings, cytology, and  
79 surgical resections were additionally excluded. Next, we divided each pathology note into  
80 sections and excluded non-diagnostic text such as clinical history or headers. For each patient,  
81 pathology notes were linked to endoscopy impression data by date (any upper endoscopy within  
82 the 3 days preceding a pathology note). Pathology reports of externally obtained endoscopy  
83 specimens were not linked to endoscopy data, as this procedure data was not available.  
84 Endoscopies without biopsies were not linked with pathology reports. To improve medical  
85 concept recognition, we applied an expanded dictionary for BE-related terminology,  
86 incorporated additional negation logic, and removed extraneous punctuation from the pathology  
87 free text. Our system architecture is summarized in **Figure 2**.

88 We applied MetaMapLite to the processed pathology text, extracting Unified Medical  
89 Language System (UMLS) concept unique identifiers (CUIs) that represent medical concepts.  
90 We filtered the CUIs to include esophageal or gastroesophageal anatomic concepts and BE-  
91 related histological diagnosis concepts. Specimen-level diagnoses were derived by linking  
92 sequential filtered anatomic location and histologic diagnosis concepts within the pathology  
93 report text. The worst specimen-level BE diagnosis concept within a given pathology report  
94 defined the procedure-level diagnosis concept. A final set of rules reduced the MetaMapLite-  
95 generated diagnosis concepts to the previously defined full set of BE diagnosis labels (*no BE*,  
96 *no dysplasia*, *indefinite for dysplasia*, *LGD*, *HGD*, and *EAC*). Simplified binary diagnosis labels  
97 for dysplasia and EAC were derived from the full set of labels. BE-related endotherapies were  
98 extracted from structured endoscopy impression and maneuver endoscopy report data using  
99 string searches. Each endoscopy could have multiple endotherapy classifications.

100

101 **Calculation of Patient-level Quality Metrics**

102 We applied the NLP pipeline to the original cohort of patients who had upper endoscopy  
103 for BE-related indications, with the goal of identifying all patients who initiated endoscopic  
104 eradication therapy (EET) for BE during the period of interest. Manual review to exclude those  
105 not meeting the clinical definition of BE was not performed as it was assumed that patients with  
106 a BE-related indication for endoscopy and evidence of endotherapy had a confirmed diagnosis  
107 of BE. An additional rule-based algorithm was applied to the resulting procedure-level data to  
108 identify the dates of key clinical events including endotherapy initiation, ongoing endotherapy,  
109 CE-D (complete eradication of dysplasia), and CE-IM (complete eradication of intestinal  
110 metaplasia). We defined EET initiation as the date of the first resection of visible abnormalities  
111 (EMR or ESD) or ablation (RFA or cryotherapy) where there was a concurrent or immediately  
112 preceding histologic diagnosis of BE-related dysplasia. APC was not considered to be a valid  
113 initial EET modality as it was primarily used as a touch-up treatment. Ongoing endotherapy was  
114 defined as the inclusive period between the endotherapy initiation and CE-IM. CE-IM was  
115 defined as the first date on which there was no histologic evidence of BE or BE-related  
116 neoplasias and no documented endotherapy in a patient undergoing EET. CE-D was defined  
117 as the first date on which there was histologic evidence of dysplasia and no documented  
118 endotherapy in a patient undergoing EET. All patients who had an NLP-derived EET initiation  
119 date, were between the ages of 40 and 80, and did not undergo esophagectomy (past or future)  
120 were included in the EET set. Ground truth labels for key clinical event dates were assigned via  
121 manual review of all available EHR data. Using the NLP-derived key clinical event dates and  
122 additional algorithmic rules, we determined patient-level variables such as worst pre-EET  
123 diagnosis, endotherapy modalities received, endotherapy duration, time to CE-IM, and time to  
124 CE-D.

125

126 **Statistical Analysis**



127 For the validation set, Kaplan's Kappa was calculated between the 2 gastroenterologist  
128 annotators to determine interrater reliability. Performance metrics comparing the NLP tool to  
129 the ground truth labels were calculated for all datasets. Macro accuracy, precision (positive  
130 predictive value), recall (sensitivity), and F1-score (the harmonic mean of precision and recall)  
131 were determined for the multiclass NLP classifier at the global level, as well as for diagnosis and  
132 endotherapy alone. Performance metrics for the binary diagnosis classifiers were determined at  
133 the diagnosis level only. Discrepancies between the ground truth and NLP labels were  
134 identified and qualitatively grouped by presumed error etiology.

135

## 136 RESULTS

### 137 Dataset Characteristics

138 977 patients underwent BE surveillance or endotherapy during the period of interest.  
139 After applying exclusion criteria, the development and validation sets included 99 and 115  
140 patients respectively (**Figure 1**). Out of the 377 endoscopies in the development set, 43.5%  
141 found a diagnosis of BE or worse, 15.9% found dysplasia or worse, and 2.9% found  
142 adenocarcinoma (**Table 1**). There was a similar histologic diagnosis distribution in the validation  
143 set (44.9%, 12.5%, 5.5% out of 400 endoscopies). In both the development and validation sets,  
144 similar proportions of the endoscopies had associated endotherapy data (29.4% versus 29.3%).  
145 The distribution of endotherapy was also similar between the two sets, except that the validation  
146 set had a higher proportion of radiofrequency ablation (15.0% vs. 11.4%) and a lower proportion  
147 of cryotherapy (2.0% vs. 4.5%) compared to the development set.

148 **Table 1:** Ground-Truth Characteristics of the Development and Validation Datasets.

149

|                                                    | <b>Development Set</b><br>(n = 99 patients)<br>(n = 377 procedures) | <b>Validation Set</b><br>(n = 115 patients)<br>(n = 399 procedures) |
|----------------------------------------------------|---------------------------------------------------------------------|---------------------------------------------------------------------|
| <b>Patient Characteristics</b>                     |                                                                     |                                                                     |
| Median procedures per patient (IQR)                | 3.0 (1.5-5.0)                                                       | 3.0 (1.0-5.0)                                                       |
| Median endoscopy reports per patient (IQR)         | 3.0 (1.0-5.0)                                                       | 2.0 (1.0-4.0)                                                       |
| Median pathology reports per patient (IQR)         | 2.0 (1.0-4.0)                                                       | 2.0 (1.0-4.0)                                                       |
| <b>Procedure-level BE-related diagnosis, n (%)</b> |                                                                     |                                                                     |

|                                                       |             |             |
|-------------------------------------------------------|-------------|-------------|
| No specimens                                          | 74 (19.6%)  | 79 (19.8%)  |
| No evidence of BE                                     | 139 (36.9%) | 141 (35.3%) |
| BE with no dysplasia                                  | 89 (23.6%)  | 101 (25.3%) |
| BE, indefinite for dysplasia                          | 15 (4.0%)   | 22 (5.5%)   |
| BE with low-grade dysplasia                           | 18 (4.8%)   | 8 (2.0%)    |
| BE with high-grade dysplasia                          | 31 (8.2%)   | 26 (6.5%)   |
| Esophageal adenocarcinoma                             | 11 (2.9%)   | 22 (5.5%)   |
| <b>Procedure-level BE-related endotherapy,* n (%)</b> |             |             |
| No endotherapy                                        | 266 (70.6%) | 282 (70.7%) |
| Endoscopic mucosal resection                          | 29 (7.7%)   | 28 (7.0%)   |
| Endoscopic submucosal dissection                      | 1 (0.3%)    | 1 (0.3%)    |
| Radiofrequency ablation                               | 43 (11.4%)  | 60 (15.0%)  |
| Argon plasma coagulation                              | 35 (9.3%)   | 32 (8.0%)   |
| Cryotherapy                                           | 17 (4.5%)   | 8 (2.0%)    |

150 BE: Barrett's Esophagus

151 \* More than one endotherapy can be performed per procedure

152

### 153 Clinical Data Labelling Performance

154 Global (both diagnosis and endotherapy) recall, precision, accuracy, and F1-score for  
 155 the multiclass classifier were 0.976, 0.970, 0.985, and 0.972 respectively in the validation set  
 156 (**Table 2**). The binary dysplasia classifier (recall: 1.000, precision: 0.966, accuracy: 0.990, F1-  
 157 score: 0.982) had improved performance across all metrics compared to the multiclass classifier  
 158 (diagnosis-only recall: 0.973, precision: 0.946, accuracy: 0.975, F1-score: 0.958).  
 159 Unsurprisingly, there was a drop in multiclass classifier performance in validation set compared  
 160 to the development set. However, binary classifier performance was maintained in the validation  
 161 set.

162 **Table 2:** Barrett's Esophagus Endoscopic Outcome Classifier Performance Metrics

163

| <b>Multiclass Classifier (all labels)</b>                                   |               |                  |                 |                 |
|-----------------------------------------------------------------------------|---------------|------------------|-----------------|-----------------|
|                                                                             | <b>Recall</b> | <b>Precision</b> | <b>Accuracy</b> | <b>F1-Score</b> |
| <b>Development Set</b>                                                      |               |                  |                 |                 |
| Global Performance                                                          | 0.985         | 0.989            | 0.995           | 0.986           |
| Diagnosis-only Performance                                                  | 0.970         | 0.977            | 0.989           | 0.971           |
| Endotherapy-only Performance                                                | 1.000         | 1.000            | 1.000           | 1.000           |
| <b>Validation Set</b>                                                       |               |                  |                 |                 |
| Global Performance                                                          | 0.976         | 0.970            | 0.985           | 0.972           |
| Diagnosis-only Performance                                                  | 0.973         | 0.946            | 0.975           | 0.958           |
| Endotherapy-only Performance                                                | 0.979         | 0.995            | 0.995           | 0.986           |
| <b>Binary Dysplasia Classifier (Presence/absence of Dysplasia or Worse)</b> |               |                  |                 |                 |
|                                                                             | <b>Recall</b> | <b>Precision</b> | <b>Accuracy</b> | <b>F1-Score</b> |
| <b>Development Set</b>                                                      |               |                  |                 |                 |
| Diagnosis-only Performance                                                  | 1.000         | 0.938            | 0.989           | 0.968           |
| <b>Validation Set</b>                                                       |               |                  |                 |                 |
| Diagnosis-only Performance                                                  | 1.000         | 0.966            | 0.990           | 0.982           |

| <b>Binary EAC Classifier (Presence/absence of Esophageal Adenocarcinoma)</b> |               |                  |                 |                 |
|------------------------------------------------------------------------------|---------------|------------------|-----------------|-----------------|
|                                                                              | <b>Recall</b> | <b>Precision</b> | <b>Accuracy</b> | <b>F1-Score</b> |
| <b>Development Set</b><br>Diagnosis-only Performance                         | 1.000         | 1.000            | 1.000           | 1.000           |
| <b>Validation Set</b><br>Diagnosis-only Performance                          | 1.000         | 1.000            | 0.995           | 0.990           |

164

## 165 **Development and Validation Set Classifier Error Analysis**

166           Diagnosis classification errors in the development set occurred due to diagnostic  
167 uncertainty narratives (n=3) and the mention of a prior diagnosis within the addendum text  
168 (n=1). A representative diagnostic uncertainty narrative is: “...*opinions varied from reactive to*  
169 *low-grade dysplasia. In my opinion, indefinite is the best classification*”. In this example, the  
170 classifier selected the most severe diagnosis without negation. It cannot process a freeform  
171 declarative statement like “*In my opinion, indefinite is the best classification.*” The presence of a  
172 prior diagnosis in the addendum text similarly cannot be resolved by our algorithm, as our  
173 pathology text NLP algorithm cannot understand temporal context in a more granular way than  
174 excluding note sub-sections that generally contain prior diagnoses (ie. The *Clinical History* sub-  
175 section).

176           Diagnosis classification errors due to diagnostic uncertainty (n=5) similar to those  
177 observed in the development set were also present in the validation set. Two additional  
178 categories of errors emerged in the validation set: novel text patterns that did not fit into the  
179 existing rules (n=4) and missing pathology report data (n=1). Novel text patterns that were not  
180 captured by the NLP system included a missing space (“*Barrett’sesophagus*”), a novel synonym  
181 for intestinal metaplasia (“*rare goblet cells*”), a new anatomic location pattern (“*Barrett’s*  
182 *patchy*”), and the presence of a publication title cited as a reference in the pathology report  
183 containing a more severe diagnosis than the remainder of the pathology report text  
184 (“*Eosinophilic infiltration of the esophagus following endoscopic ablation of Barrett’s neoplasia*”)

185 Endotherapy classification errors were related to the non-therapeutic use of ablation  
186 (n=2). In one case, cryotherapy was attempted, but aborted due to patient instability. In the  
187 other, APC was used only for marking lesion boundaries, rather than ablating abnormal tissue.

188

### 189 **BE Quality Metric Assessment**

190 The EET dataset included 77 patients whose upper endoscopy history during the period  
191 of interest comprised of 554 endoscopies, of which 254 (45.8%) involved endotherapy and 384  
192 (69.3%) had associated pathology reports (dysplasia: n=133) (**Table 3**). Within this dataset,  
193 there were 12 patients and 101 endoscopies from the development set and 20 patients and 147  
194 endoscopies from the validation set. Multiclass classifier performance slightly deteriorated in  
195 the EET set (global recall: 0.963, precision: 0.981, accuracy: 0.988, and F1-score: 0.970)  
196 compared to the validation set. Classification errors at this level were related to diagnostic  
197 uncertainty (n=7), endotherapy misclassification (n=2), and BE diagnosis misclassification  
198 (n=3). Notably, no novel text patterns were observed in this additional dataset. New BE  
199 diagnosis misclassification errors in the quality metric NLP process were attributed to the lack of  
200 a process for excluding patients who did not have a clinical diagnosis of BE. Patients who did  
201 not have BE underwent endotherapy for gastric cancer (n=2) and esophageal dysplasia (n=1)  
202 and also had endoscopic procedures for BE-related indications.

203 **Table 3:** Characteristics of Patients Undergoing Endoscopic Eradication Therapy for Barrett's  
204 Esophagus (n = 77 patients, n = 554 procedures)

| <b>Patient Characteristics</b> |              |
|--------------------------------|--------------|
| Age, avg +/- std               | 67.5 +/- 8.8 |
| Sex, n (%)                     |              |
| Male                           | 64 (83.1%)   |
| Female                         | 13 (16.9%)   |
| Race, n (%)                    |              |
| White                          | 64 (83.1%)   |
| Non-White                      | 4 (5.2%)     |
| Other/Unknown/Declined         | 9 (11.7%)    |
| Ethnicity, n (%)               |              |
| Not Hispanic                   | 57 (74.0%)   |
| Hispanic                       | 2 (2.6%)     |
| Unknown/Declined               | 18 (23.4%)   |

|                                                       |               |
|-------------------------------------------------------|---------------|
| Median procedures per patient (IQR)                   | 7.0 (5.0-8.0) |
| Median endoscopy reports per patient (IQR)            | 7.0 (5.0-8.0) |
| Median pathology reports per patient (IQR)            | 5.0 (3.0-7.0) |
| <b>Procedure-level BE-related diagnosis, n (%)</b>    |               |
| No specimens                                          | 171 (30.9%)   |
| No evidence of BE                                     | 125 (22.6%)   |
| BE with no dysplasia                                  | 66 (11.9%)    |
| BE, indefinite for dysplasia                          | 27 (4.9%)     |
| BE with low-grade dysplasia                           | 47 (8.5%)     |
| BE with high-grade dysplasia                          | 91 (16.4%)    |
| Esophageal adenocarcinoma                             | 27 (4.9%)     |
| <b>Procedure-level BE-related endotherapy,* n (%)</b> |               |
| No endotherapy                                        | 300 (54.2%)   |
| Endoscopic mucosal resection                          | 121 (21.8%)   |
| Endoscopic submucosal dissection                      | 3 (0.5%)      |
| Radiofrequency ablation                               | 230 (41.5%)   |
| Argon plasma coagulation                              | 86 (15.5%)    |
| Cryotherapy                                           | 29 (5.2%)     |

205 BE: Barrett's Esophagus

206 \* More than one endotherapy can be performed per procedure

207  
 208 Despite the diagnosis and endotherapy labelling errors, accuracy for the key clinical  
 209 event labels was uniformly high: EET start (97.4%), CE-D (100.0%), and CE-IM (100.0%).  
 210 Using the combined diagnosis, endotherapy, and event labels, our BE quality metric algorithm  
 211 successfully automated extraction of key patient-level measures: pretherapy diagnosis (LGD:  
 212 20.8%, HGD: 58.4%, EAC: 20.8%), endotherapy time (median: 8.3 months), time to CED  
 213 (median: 9.1 months), and time to CE-IM (median: 11.1 months) (**Table 4**).

214 **Table 4:** Patient-level Data for Patients Undergoing Endoscopic Eradication Therapy for  
 215 Barrett's Esophagus (n = 77 patients)

|                                                  |                 |
|--------------------------------------------------|-----------------|
| <b>Patient EET Characteristics, median (IQR)</b> |                 |
| Therapy time (months)                            | 8.3 (5.1-14.0)  |
| Time to CE-D (months)                            | 9.1 (6.5-14.6)  |
| Time to CE-IM (months)                           | 11.1 (7.8-14.7) |
| <b>Pre-EET worst BE-related diagnosis, n (%)</b> |                 |
| BE with low-grade dysplasia                      | 16 (20.8%)      |
| BE with high-grade dysplasia                     | 45 (58.4%)      |
| Esophageal adenocarcinoma                        | 16 (20.8%)      |
| <b>BE-related endotherapy received, n (%)</b>    |                 |
| Endoscopic mucosal resection                     | 42 (54.5%)      |
| Endoscopic submucosal dissection                 | 3 (3.9%)        |
| Radiofrequency ablation                          | 60 (77.9%)      |
| Argon plasma coagulation                         | 34 (44.2%)      |
| Cryotherapy                                      | 18 (23.4%)      |

216 BE: Barrett's Esophagus

217  
 218 **DISCUSSION:**

219 We have developed a novel NLP pipeline for automated extraction of key endoscopic BE  
220 surveillance and treatment data. The datasets generated by the pipeline additionally facilitate  
221 expedited manual data review for additional metrics not directly obtained by the pipeline. The  
222 pipeline performed well both when using all relevant BE diagnoses as well as simplified binary  
223 diagnoses (presence/absence of dysplasia or cancer). We reliably extracted key clinical events  
224 and higher-level patient-level variables such as worst pre-EET histologic diagnosis, endotherapy  
225 time, and time to CE-IM. This represents a significant improvement over current labor-intensive  
226 data extraction approaches using manual chart review.

227 There is a single prior study of NLP for BE clinical data extraction, in which a machine-  
228 learning-based approach was used to extract dysplasia diagnoses from the pathology reports of  
229 randomly sampled patients with BE. This approach yielded 0.987 accuracy, 0.923 recall, 1.000  
230 precision, and an F1-score of 0.960 in a validation set with a similar number of dysplasia cases  
231 (29). For the binary BE dysplasia classification task, our method outperformed the prior method  
232 across all measures except precision (positive predictive value). While the prior study was  
233 validated in a national database, our NLP pipeline provides higher granularity BE-related  
234 histology data as well as additional clinical data that allows the extraction of higher-level  
235 measures like BE endoscopy quality metrics.

236 Our rule-based algorithm built on the open-source MetaMapLite NLP tool enables  
237 algorithmic transparency, or the ability to understand model decision-making. When  
238 interrogating our pipeline, we found it had difficulty parsing novel text patterns like misspellings  
239 and the complex, unstructured narratives used to express diagnostic uncertainty. Diagnostic  
240 uncertainty is an especially common issue in BE pathology report text, as BE-related dysplasia  
241 diagnosis has poor interobserver agreement (31). While understandable and computationally  
242 efficient, our rule-based NLP approach hampers the generalizability of our system. The data  
243 pre-processing methods and rules based on text patterns would need to be validated before use  
244 with another EHR system or even with different time periods in the same EHR.

245 In the future, deep learning approaches could allow a more generalizable means of  
246 extracting BE pathology diagnoses from free text notes thereby reducing the need to develop  
247 complex rule-based algorithms (32-34). However, even this approach has limitations, as privacy  
248 concerns limit the transportability of model weights across institutions and deep learning models  
249 can still be prone to over-fitting to the development dataset. Novel large language models like  
250 LLaMA, Med-PALM2, and GPT-4 hold the promise of facilitating the development of NLP  
251 pipelines for clinical text with less text preprocessing and no development dataset or very small  
252 development datasets (35-38). With the time saved using such methods, future iterations of this  
253 and related systems could incorporate additional metrics relevant to BE quality, such as  
254 adherence to the Seattle protocol, use of appropriate surveillance intervals, and use of  
255 emerging risk stratification biomarkers such as p53 (8, 39).

256

## 257 **CONCLUSION**

258 We have developed and internally validated an automated NLP pipeline that extracts the full  
259 range of BE-related histological diagnoses, BE-related endoscopic therapies, and key BE-  
260 related quality metrics using both pathology reports and structured endoscopy report data.  
261 Future research is needed to extend this approach to novel large language model technologies  
262 and to assess generalizability to other institutions.

263

264 **Ethics Statement:** The Institutional Review Board of Columbia University Irving Medical Center  
265 reviewed the protocol for this study and gave ethical approval for this work.

266

267 **Data Availability Statement:** All data produced in the present study are available upon  
268 reasonable request to the authors.

269

270 **Financial Support:** This study was supported by grants from the NIH/NCI (P30CA013696,  
271 R01CA238433), NIH/NCATS (UL1TR001873), NIH/NLM (T15LM007079, R01LM009886), and  
272 NIH/NIGMS (GM131905)

273

274 **Potential Competing Interests:** The authors declare no conflicts of interest.



## REFERENCES:

1. Siegel RL, Miller KD, Fuchs HE, et al. Cancer statistics, 2022. *CA Cancer J Clin* 2022;72:7-33.
2. Recent Trends in SEER Age-Adjusted Incidence Rates, 2000-2019. In; 2022.
3. SEER 5-Year Relative Survival Rates, 2012-2018. In; 2022.
4. Sharma P. Barrett Esophagus: A Review. *JAMA* 2022;328:663-671.
5. Shaheen NJ, Falk GW, Iyer PG, et al. ACG Clinical Guideline: Diagnosis and Management of Barrett's Esophagus. *Am J Gastroenterol* 2016;111:30-50; quiz 51.
6. Muthusamy VR, Wani S, Gyawali CP, et al. AGA Clinical Practice Update on New Technology and Innovation for Surveillance and Screening in Barrett's Esophagus: Expert Review. *Clin Gastroenterol Hepatol* 2022.
7. Asge Standards Of Practice C, Qumseya B, Sultan S, et al. ASGE guideline on screening and surveillance of Barrett's esophagus. *Gastrointest Endosc* 2019;90:335-359 e2.
8. Roumans CAM, van der Bogt RD, Steyerberg EW, et al. Adherence to recommendations of Barrett's esophagus surveillance guidelines: a systematic review and meta-analysis. *Endoscopy* 2020;52:17-28.
9. Wani S, Muthusamy VR, Shaheen NJ, et al. Development of quality indicators for endoscopic eradication therapies in Barrett's esophagus: the TREAT-BE (Treatment with Resection and Endoscopic Ablation Techniques for Barrett's Esophagus) Consortium. *Gastrointest Endosc* 2017;86:1-17 e3.
10. Sharma P, Katzka DA, Gupta N, et al. Quality indicators for the management of Barrett's esophagus, dysplasia, and esophageal adenocarcinoma: international consensus recommendations from the American Gastroenterological Association Symposium. *Gastroenterology* 2015;149:1599-606.

11. Johnson EK, Nelson CP. Values and pitfalls of the use of administrative databases for outcomes assessment. *J Urol* 2013;190:17-8.
12. To T, Estrabillo E, Wang C, et al. Examining intra-rater and inter-rater response agreement: a medical chart abstraction study of a community-based asthma care program. *BMC Med Res Methodol* 2008;8:29.
13. Garza MY, Williams T, Myneni S, et al. Measuring and controlling medical record abstraction (MRA) error rates in an observational study. *BMC Med Res Methodol* 2022;22:227.
14. Zozus MN, Pieper C, Johnson CM, et al. Factors Affecting Accuracy of Data Abstracted from Medical Records. *PLoS One* 2015;10:e0138649.
15. Nahm ML, Pieper CF, Cunningham MM. Quantifying data quality for clinical trials using electronic data capture. *PLoS One* 2008;3:e3049.
16. Imler TD, Morea J, Kahi C, et al. Natural language processing accurately categorizes findings from colonoscopy and pathology reports. *Clin Gastroenterol Hepatol* 2013;11:689-94.
17. Mehrotra A, Dellon ES, Schoen RE, et al. Applying a natural language processing tool to electronic health records to assess performance on colonoscopy quality measures. *Gastrointest Endosc* 2012;75:1233-9 e14.
18. Harkema H, Chapman WW, Saul M, et al. Developing a natural language processing application for measuring the quality of colonoscopy procedures. *J Am Med Inform Assoc* 2011;18 Suppl 1:i150-6.
19. Gawron AJ, Thompson WK, Keswani RN, et al. Anatomic and advanced adenoma detection rates as quality metrics determined via natural language processing. *Am J Gastroenterol* 2014;109:1844-9.

20. Lee JK, Jensen CD, Levin TR, et al. Accurate Identification of Colonoscopy Quality and Polyp Findings Using Natural Language Processing. *J Clin Gastroenterol* 2019;53:e25-e30.
21. Raju GS, Lum PJ, Slack RS, et al. Natural language processing as an alternative to manual reporting of colonoscopy quality metrics. *Gastrointest Endosc* 2015;82:512-9.
22. Fevrier HB, Liu L, Herrinton LJ, et al. A Transparent and Adaptable Method to Extract Colonoscopy and Pathology Data Using Natural Language Processing. *J Med Syst* 2020;44:151.
23. Naylor J, Borges LF, Goryachev S, et al. Natural Language Processing Accurately Calculates Adenoma and Sessile Serrated Polyp Detection Rates. *Dig Dis Sci* 2018;63:1794-1800.
24. Parthasarathy G, Lopez R, McMichael J, et al. A natural language-based tool for diagnosis of serrated polyposis syndrome. *Gastrointest Endosc* 2020;92:886-890.
25. Imler TD, Morea J, Kahi C, et al. Multi-center colonoscopy quality measurement utilizing natural language processing. *Am J Gastroenterol* 2015;110:543-52.
26. Savova GK, Masanz JJ, Ogren PV, et al. Mayo clinical Text Analysis and Knowledge Extraction System (cTAKES): architecture, component evaluation and applications. *J Am Med Inform Assoc* 2010;17:507-13.
27. Aronson AR. Effective mapping of biomedical text to the UMLS Metathesaurus: the MetaMap program. *Proc AMIA Symp* 2001:17-21.
28. Imler TD, Morea J, Imperiale TF. Clinical decision support with natural language processing facilitates determination of colonoscopy surveillance intervals. *Clin Gastroenterol Hepatol* 2014;12:1130-6.
29. Wenker TN, Natarajan Y, Caskey K, et al. Using Natural Language Processing to Automatically Identify Dysplasia in Pathology Reports for Patients with Barrett's Esophagus. *Clin Gastroenterol Hepatol* 2022.

30. Demner-Fushman D, Rogers WJ, Aronson AR. MetaMap Lite: an evaluation of a new Java implementation of MetaMap. *J Am Med Inform Assoc* 2017;24:841-844.
31. Salomao MA, Lam-Himlin D, Pai RK. Substantial Interobserver Agreement in the Diagnosis of Dysplasia in Barrett Esophagus Upon Review of a Patient's Entire Set of Biopsies. *Am J Surg Pathol* 2018;42:376-381.
32. Legnar M, Daumke P, Hesser J, et al. Natural Language Processing in Diagnostic Texts from Nephropathology. *Diagnostics (Basel)* 2022;12.
33. Mitchell JR, Szepietowski P, Howard R, et al. A Question-and-Answer System to Extract Data From Free-Text Oncological Pathology Reports (CancerBERT Network): Development Study. *J Med Internet Res* 2022;24:e27210.
34. Gao S, Alawad M, Schaefferkoetter N, et al. Using case-level context to classify cancer pathology reports. *PLoS One* 2020;15:e0232840.
35. Sivarajkumar S, Wang Y. HealthPrompt: A Zero-shot Learning Paradigm for Clinical Natural Language Processing. *AMIA Annu Symp Proc* 2022;2022:972-981.
36. OpenAI. GPT-4 Technical Report. 2023:arXiv:2303.08774.
37. Touvron H, Lavril T, Izacard G, et al. LLaMA: Open and Efficient Foundation Language Models. 2023:arXiv:2302.13971.
38. Singhal K, Tu T, Gottweis J, et al. Towards Expert-Level Medical Question Answering with Large Language Models. 2023:arXiv:2305.09617.
39. Redston M, Noffsinger A, Kim A, et al. Abnormal TP53 Predicts Risk of Progression in Patients With Barrett's Esophagus Regardless of a Diagnosis of Dysplasia. *Gastroenterology* 2022;162:468-481.

1 **FIGURE LEGENDS**

2

3 **Figure 1. Patient flow diagram.**

4

5 **Figure 2. Summary of system architecture.** Free text upper endoscopy pathology reports  
6 from the current and historic EHR systems are sourced from the CUIMC Clinical Data  
7 Repository (CDR). Concept Unique Identifiers (CUIs) pertaining to diagnoses are extracted from  
8 pathology reports using MetaMap Lite. Structured procedure-related data, including  
9 endotherapies, are extracted from the ProVation endoscopy documentation database and  
10 merged with the corresponding pathology report diagnoses to create report-level assessments.  
11 A patient-level summary is then generated from multiple report-level assessments according to  
12 the clinical logic specified in a rule base.

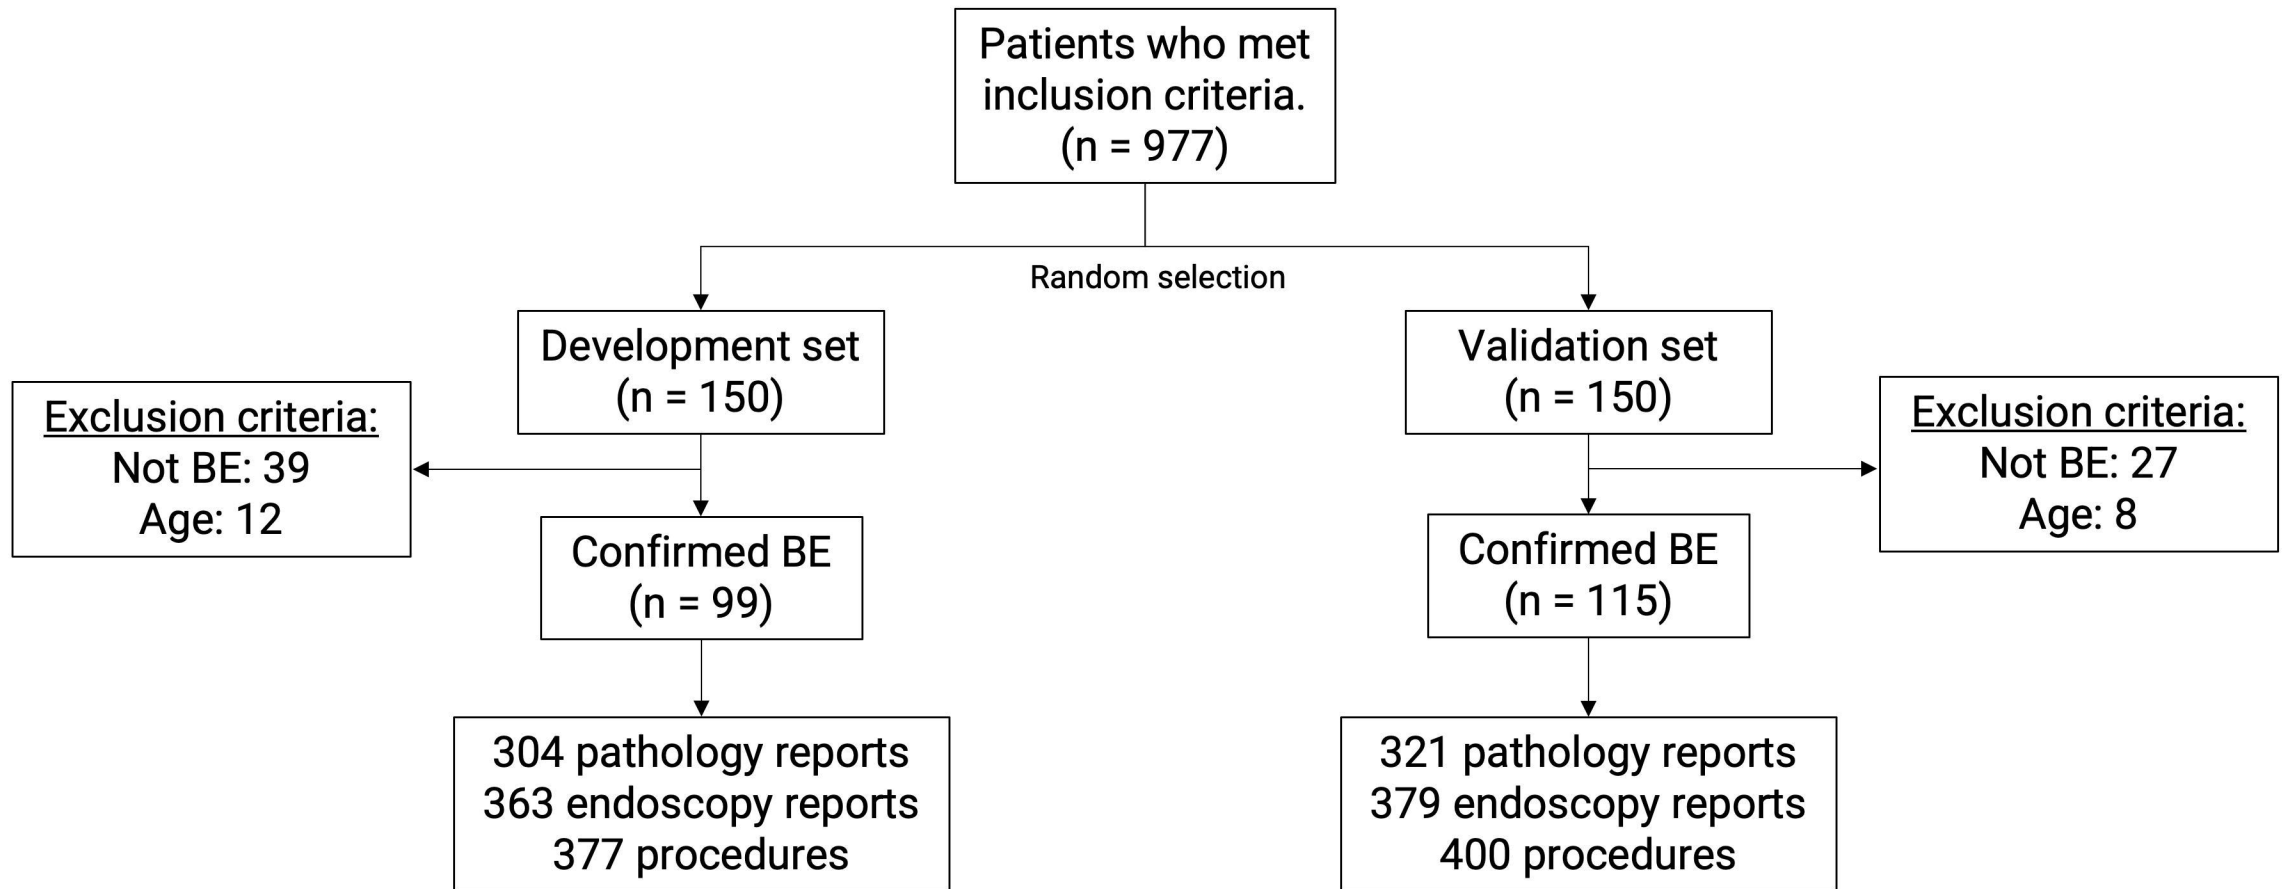

Source: https://medrxiv.org/content/10.1101/2023.07.11.23292529.full.pdf
